# Supplementary material
Source: publisher site journal article supplement (http://www.spandidos-publications.com/4007/downloadSupplementary)

Figure S1. uNK cell subtype percentages of studied groups. Images represent flow cytometry plots of endometrial cells, including lymphocyte cells, single cells, and CD3<sup>+</sup> cells. (A) HA + IGT group; (B) HA + DM group; (C) HA + NIR group; (D) NHA + IR group; (E) NHA + NIR group. HA, hyperandrogenemia; IGT, impaired glucose tolerance; DM, diabetes mellitus; NIR, non-insulin resistance; NHA, non-hyperandrogenemia androgen; IR, insulin resistance; uNK cells, uterine natural killer cells.

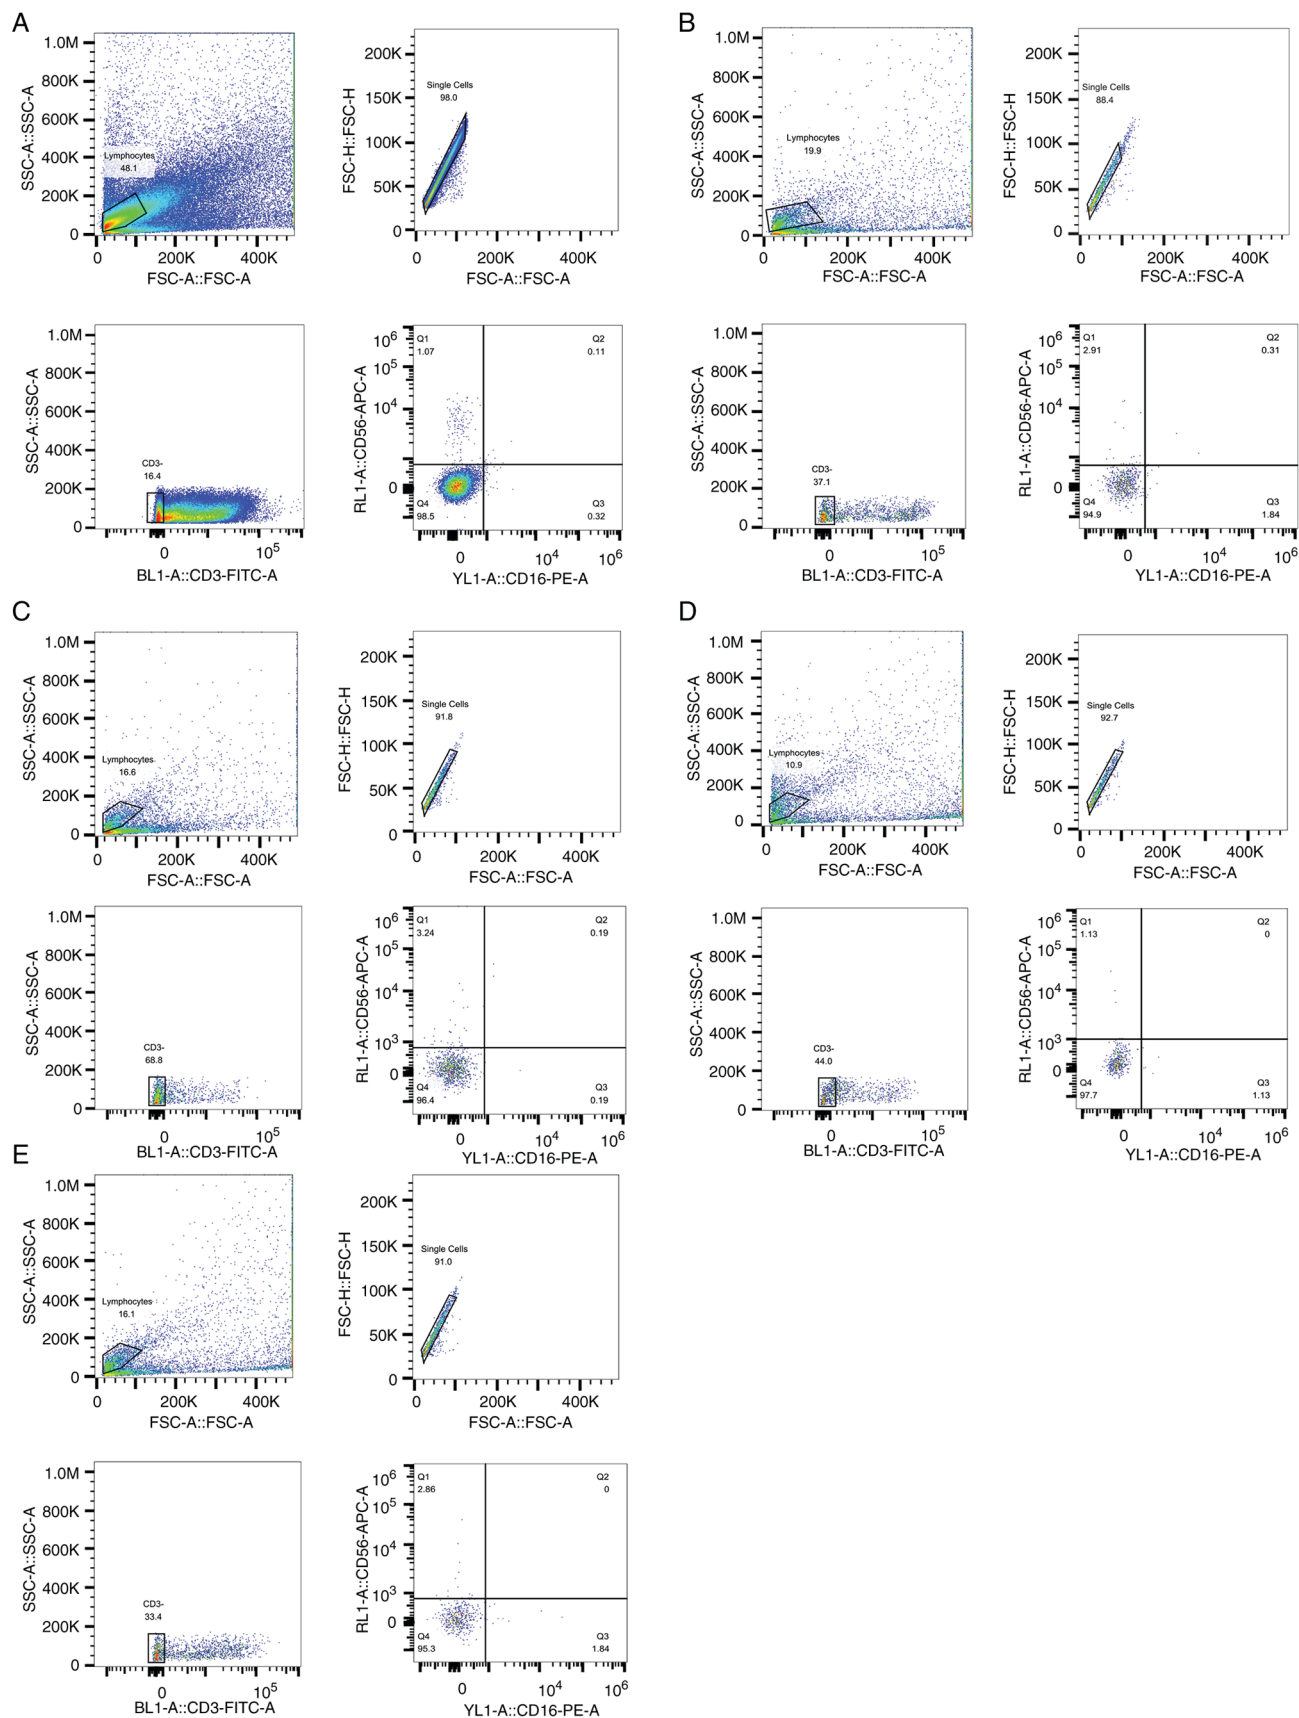

Figure S2. uNK cell subtype percentages of studied groups. Images represent flow cytometry plots of endometrial cells, including lymphocytes cells, single cells, and CD3<sup>+</sup> cells. (A) lean/normal group; (B) overweight group; (C) obese group. HA, hyperandrogenemia; IGT, impaired glucose tolerance; DM, diabetes mellitus; NIR, non-insulin resistance; NHA, non-hyperandrogenemia androgen; IR, insulin resistance; uNK cells, uterine natural killer cells.

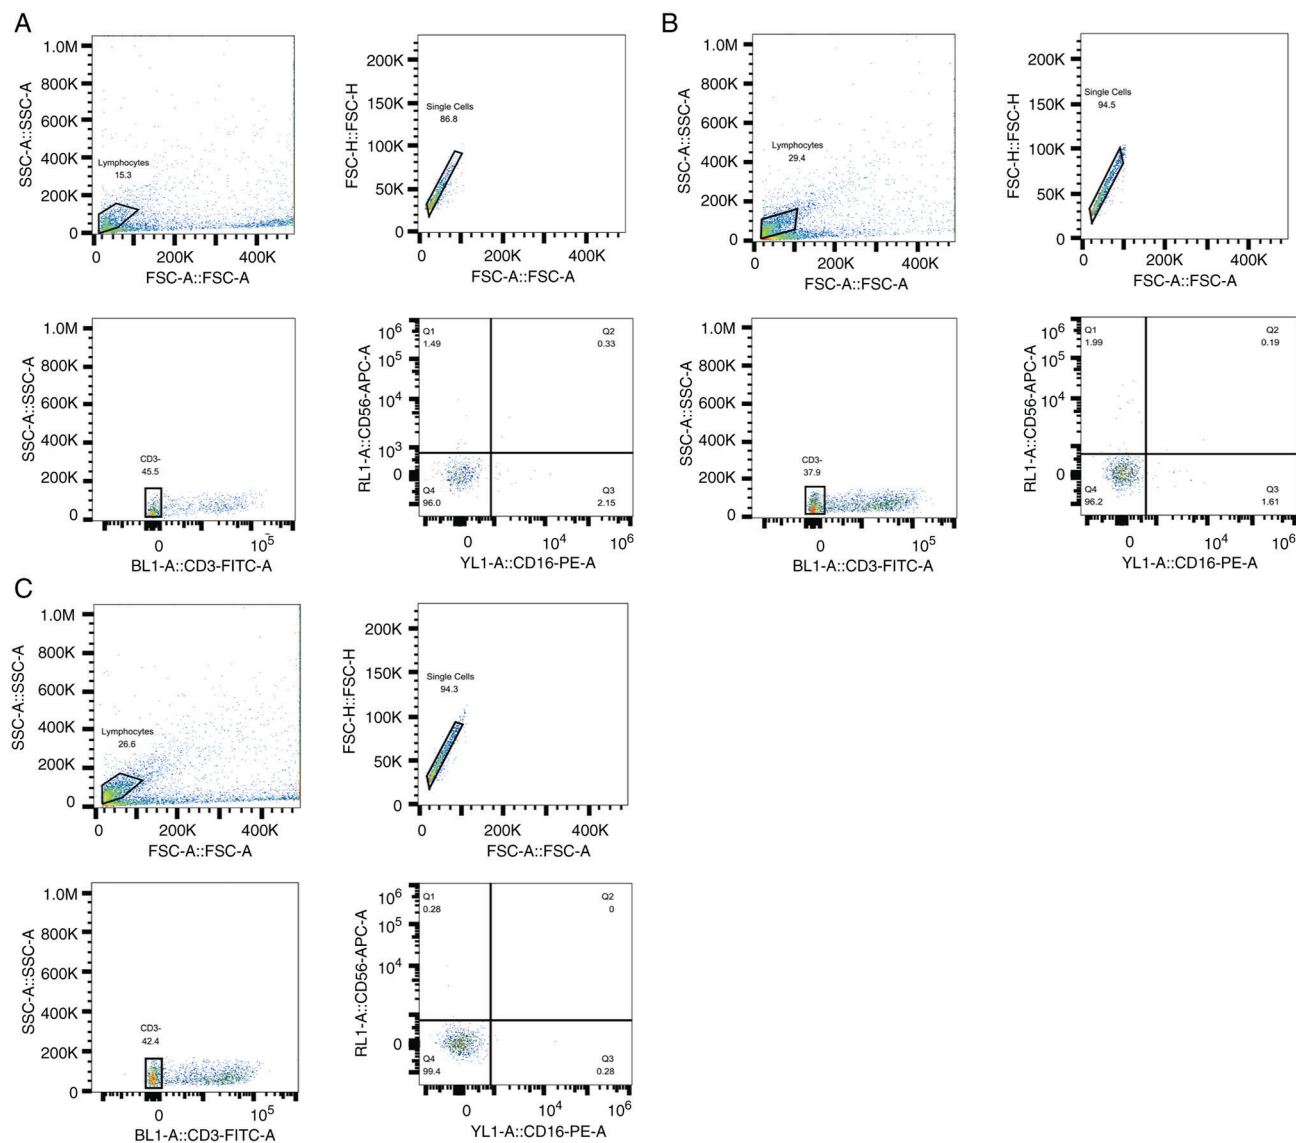

Supplement: Supplementary file 1 [file downloadSupplementary]
